1 **Sex-specific crossover rates did not change with parental age in**  
2 ***Arabidopsis***

3  
4 **Ramswaroop Saini<sup>1,4</sup>, Amit Kumar Singh<sup>2</sup>, Geoffrey J. Hyde<sup>3</sup> and Ramamurthy Baskar<sup>1\*</sup>**

5  
6  
7 <sup>1</sup>Department of Biotechnology, Indian Institute of Technology–Madras, Bhupat and Jyoti Mehta  
8 School of Biosciences, Chennai 600 036, India.

9 <sup>2</sup>School of Plant Sciences and Food Security, Tel Aviv University, Tel Aviv 6997801, Israel.

10 <sup>3</sup>Independent Researcher, Randwick, New South Wales, Australia

11 <sup>4</sup>Department of Biotechnology, Kalinga University, Raipur, Chhattishgarh 492101 India.

12

13

14 **Running Title: Parental age did not influence sex-specific crossover rates in *Arabidopsis***

15

16 **Key Words:** *Arabidopsis thaliana*, meiotic recombination, parental age, centromere, crossing

17 over, heterochiasmy

18

19 Corresponding author: Ramamurthy Baskar

20 Email id : rbaskar@iitm.ac.in

21 Phone number : 044-2257-4110

22 Address: Department of Biotechnology, Indian Institute of Technology–Madras, Bhupat and  
23 Jyoti Mehta School of Biosciences, Chennai 600 036, India.

24

## 25 **Abstract**

26

27 Crossing over, the exchange of DNA between the chromosomes during meiosis, contributes  
28 significantly to genetic variation. The rate of crossovers (CO) varies depending upon the taxon,  
29 population, age, external conditions, and also, sometimes, between the sexes, a phenomenon  
30 called heterochiasmy. In the model plant *Arabidopsis thaliana*, the male rate of crossovers  
31 (mCO) is typically nearly double the female rate (fCO). With increasing parental age, it has been  
32 reported that the disparity decreases, because fCO rises while mCO remains stable. That finding,  
33 however, is based on chromosome-based averaging, and it is unclear whether all parts of the  
34 genome respond similarly. We addressed this point by examining how the level of heterochiasmy  
35 responded to parental age in eight genomic intervals distributed across the five chromosomes of  
36 *Arabidopsis*. Unlike the previous work, in each of the eight intervals, the level of heterochiasmy  
37 did not change with age, that is, the ratio mCO:fCO remained stable. As expected, though,  
38 amongst the intervals, the levels of heterochiasmy at any of the four ages examined, did vary.  
39 We propose that while the levels of heterochiasmy in *Arabidopsis* might decrease with age on a  
40 chromosomal basis, as reported earlier, this is not true for all locations within each chromosome.  
41 This has practical implications for plant breeding research, a major aim of which is identifying  
42 ways to induce local increases in CO rates.

43

44

## 45 **Introduction**

46 During meiotic crossing over, homologous chromosomes align and exchange paternally and  
47 maternally derived DNA. Crossovers (CO) are one of the main sources of variation in sexually  
48 reproducing organisms, and as such, the rate at which they occur has considerable evolutionary  
49 significance (Ritz *et al.* 2017; Stapley *et al.* 2017). If the rate is too low, the organism has less  
50 chance of adaptation, if too high, an already effective genotype runs the risk of disruption. While  
51 the rate of crossovers can vary across taxa, populations, and between and within individuals, the  
52 possible scale of variation across these various levels appears remarkably constrained (Ritz *et al.*  
53 2017). Nevertheless, the scope for some degree of CO rate variation exists for individual  
54 organisms, and is of practical importance, both medically and economically. For example, the  
55 frequencies of several forms of human chromosomal number abnormalities (in particular,  
56 trisomies) correlate with the increased frequency of CO (Hussin *et al.* 2011; Alves *et al.* 2017).  
57 In plant breeding, the development of ‘elite’ genotypes depends on meiotic COs that allow the  
58 accumulation of desirable traits, and much research is focused on finding ways to increase local  
59 CO rates (Wijnker and Dejong 2008; Crismani *et al.* 2013; Fernandes *et al.* 2018).

60 Interestingly, it is often not just the overall rate of CO that is important, but also the ratio of the  
61 male and female rates of CO (henceforth, mCO and fCO). In many taxa, these two rates differ to  
62 a greater or lesser extent, a phenomenon called heterochiasmy (Ritz *et al.* 2017; Stapley *et al.*  
63 2017). At the most extreme, in what is called achiasmy, one sex does not form chiasmata at all  
64 (John *et al.* 2016; Satomura *et al.* 2019). This is the case, for example, in the male of *Drosophila*,  
65 in which chromosome alignment employs an alternative to the synaptonemal complex (McKee *et*

66 *al.* 2012). In true heterochiasmy, the ratio between the rates of the more and less recombinative  
67 sexes can vary from 1.035 to 14 (Ritz *et al.* 2017). Evidence indicates that, for a truly  
68 heterochiasmatic species, the sex that has the lower rate of CO will be the one for which genetic  
69 stability in the haploid phase is most likely to be critical to the future organism's fitness  
70 (Lenormand 2003; Lenormand and Dutheil 2005; Stapley *et al.* 2017). In *Arabidopsis*, for  
71 example, its high self-pollination rate (95%; (Charlesworth and Vekemans 2005) suggests that  
72 the female haploid phase is most critical, thus possibly explaining why fCO has the lesser value  
73 (Lenormand 2003; Lenormand and Dutheil 2005). The ratio of mCO:fCO in young *Arabidopsis*  
74 seedlings is typically about 1.8 (Toyota *et al.* 2011; Giraut *et al.* 2011), but amongst different  
75 accessions, the values can vary by about 22% (López *et al.* 2012).

76  
77 As well as having evolutionary drivers, both the overall, and sex-specific, CO rates, and also  
78 mCO:fCO, are influenced by age and extrinsic stressors such as temperature, pathogens,  
79 chemical exposure, and lack of nutrients (Hayman and Parsons 1962; Francis *et al.* 2007; Toyota  
80 *et al.* 2011; Hussin *et al.* 2011; Martin *et al.* 2015; Halldorsson *et al.* 2016; Li *et al.* 2017;  
81 Modliszewski and Copenhaver 2017; Saini *et al.* 2017; Stapley *et al.* 2017). The effect of age on  
82 mCO:fCO, and its mechanistic basis, has been much studied in humans because the increased  
83 rates of CO implicated in the chromosomal number abnormalities mentioned above mostly occur  
84 in older women (Hussin *et al.* 2011; Chiang *et al.* 2012; Nagaoka *et al.* 2012; Alves *et al.* 2017).

85  
86 For plant CO, much less is known about age x sex interactions. For example, with respect to the  
87 influence of age on patterns of heterochiasmy in *Arabidopsis*, there has only been one study  
88 (Toyota *et al.* 2011); other studies have examined the response of mCO only (Francis *et al.* 2007;

89 Li *et al.* 2017). In Toyota *et al.* (2011), the extent of heterochiasmy in primary shoots decreased  
90 with age, because, although there was no change in mCO, there was an increase in fCO. It is  
91 unclear, however, whether this pattern is true for each location in the chromosome. That study  
92 looked at 343 markers across the five chromosomes of the species, and reported on the average  
93 change of mCO and fCO for each chromosome, taking the mean of rates for the set of each  
94 chromosome's applicable markers. The likelihood of intrachromosomal variation of  
95 heterochiasmic values is suggested by the results of Li *et al.* (2017). That study found that while  
96 mCO in primary shoots did not significantly change with age for markers in five of nine genomic  
97 intervals (thus in agreement with the earlier results of Toyota *et al.* 2011), the rates did  
98 significantly increase in two intervals. The possibility of intrachromosomal variation in  
99 *Arabidopsis* heterochiasmy is also supported by other studies that have shown that, at least at one  
100 time point, the chromosomal average, and location-specific, values of mCO:fCO vary greatly  
101 depending on which chromosome is examined, and the location with the chromosome {Drouaud  
102 et al., 2007; Giraut et al., 2011}.

103

104 In this study we explore the possibility of intrachromosomal variation further, by looking at the  
105 influence of parental age on mCO, fCO, and mCO:fCO, using eight markers that cover all five  
106 chromosomes of *Arabidopsis*. Plants were sampled at four time points that cover the full  
107 reproductive duration of the *Arabidopsis* main shoot. We find that, while, at any one age, the  
108 ratio mCO:fCO differed both inter- and intra-chromosomally, the ratio, and also mCO and fCO,  
109 did not change with parental age of the main shoot. We believe the most likely reasons for the  
110 apparent discrepancy between our results and previous findings (i.e. Toyota et al., 2011) is that:  
111 (1) on the one hand, our small set of markers did not include any of the locations that exhibit an

112 age-response by fCO nor, for that matter, any of those that exhibit an age-response by mCO (as  
113 reported in Li, 2017); (2) on the other hand, by reporting only on the chromosomal averages of  
114 mCO:fCO, the earlier study could not detect any of an intrachromosomal spectrum of age-  
115 responses. It appears this spectrum is wide enough to include a lack of response at some  
116 locations, as we have reported for all three parameters, and as Li et al. (2017) report for mCO.

117

## 118 **Materials and methods**

### 119 *Plant growth conditions*

120 Freshly harvested *Arabidopsis* seeds from Columbia or detector lines (described below) were  
121 surface sterilized with 70% ethanol, followed by 0.5% bleach treatment for 3 min. Subsequently,  
122 the seeds were washed thrice with sterile water and plated on autoclaved Murashige and Skoog  
123 media (MS, with 3% sucrose), pH 5.7, containing 0.05% Plant Preservative Mixture (Biogenuix  
124 Medsystem Pvt. Ltd., New Delhi, India) and incubated at 4° C in dark conditions, for  
125 synchronized germination. After 48 h, the plates were shifted to a seed germination chamber,  
126 with a uniform light intensity of 8000 lux units (16-h light/8-h dark cycle). The temperature of  
127 the chamber (Percival CU-36L6) was maintained at 22° C with a constant humidity of 80%.  
128 Three-week old seedlings were transferred from MS plates to soil and grown inside a plant  
129 growth chamber (Percival AR-36L3). The soil had equal proportions of garden soil, peat, perlite,  
130 and vermiculite (Keltech Energies Ltd., Bangalore, India).

131

132 ***Arabidopsis detector lines used to score CO rates***

133 To score CO rates, eight different detector lines covering at least one marker in each of the five  
134 chromosomes were used. The detector lines Col3-4/20, 3158 and 3162 were kind gifts from  
135 Avraham A. Levy (Department of Plant Sciences, Weizmann Institute of Science, Israel),  
136 (Melamed-Bessudo *et al.* 2005). Another set of detectors, the traffic lines CTL1.2, CTL1.18,  
137 CTL2.4, CTL4.7 and CTL5.17 were obtained from the Arabidopsis Biological Resource Center  
138 (Ohio State University, USA), (Wu *et al.* 2015) (Table 1). In all the lines, the eGFP and dsRed  
139 markers are driven by a seed-specific napin promoter. The detector lines, homozygous for both  
140 markers were crossed with Columbia plants, and the seeds obtained (heterozygous for both eGFP  
141 and dsRed) were used in the subsequent experiments.

142

143 ***Investigating parental age effect on CO rates***

144 To examine the influence of parental age on CO rates, plants of the detector lines and Columbia  
145 plants, of four different ages (40, 45, 50 and 55 DAS (days after sowing), were emasculated 48 h  
146 before pollination and reciprocally crossed with each other. Different colored threads were used  
147 to mark emasculated and pollinated flowers of different age groups. For each age, approximately  
148 20 to 30 crosses were performed in three independent replicates. To score recombination during  
149 megaspore formation (fCO), we used emasculated flowers from the detector lines and crossed  
150 them with pollen from Columbia plants. Similarly, to estimate recombination rates during  
151 microspore formation (mCO), we used a detector line as the pollen donor for emasculated  
152 flowers of Columbia.

153

154 ***Calculation of CO rates***

155 The segregation of eGFP and dsRed markers (an indication of CO rates during micro- or mega-  
156 sporogenesis in the detector line parent), was analysed by the manual counting of seeds. Seeds  
157 were placed on a glass slide and analyzed under a Nikon Stereozoom Microscope (SMZ 1000)  
158 equipped with filters specific for both eGFP and dsRed. Images were captured for eGFP and  
159 dsRed separately and then both the images merged to identify the recombinant and non-  
160 recombinant seeds. CO rates were estimated based on the segregation of eGFP and dsRed  
161 markers. Of the four types of seeds obtained, seeds that fluoresce only either red or only green  
162 were counted as having undergone a CO, while the seeds that fluoresce for both red and green as  
163 well as those that do not fluoresce at all, were counted as not having undergone a CO. MR rates  
164 were calculated based on the formula:

165

$$\text{CO rate} = \frac{(R + G)}{(R + G + RG + NFS)} \times 100$$

169

170 R- dsRed-only expressing seeds; G- eGFP only expressing seeds; RG- Seeds expressing both  
171 dsRed and eGFP; NFS- non-fluorescent seeds. The ‘rate’ is actually more correctly called a  
172 frequency, but we have used the term ‘rate’ because of its common usage in the literature.

173



174 ***Statistical analysis***

175 Meiotic CO rates follow a normal distribution and hence, a Gaussian generalized linear model  
176 (GLM) with identity link function was used (Nelder and Wedderburn 1972). The linear  
177 predictors were either the different ages, or the sex, of the detector-line parent. In all GLMs, the  
178 data from groups were compared. Correction for multiple testing was done to maintain the  
179 family-wise error rate at 5% (Gabriel 1969). Therefore, the *P* values were adjusted with a single-  
180 step method that considered the joint multivariate *t* distribution of the individual test statistic  
181 (Bretz *et al.* 2016). The results were reported with the two-sided *P* values adjusted for multiple  
182 comparisons (Singh *et al.* 2015). All statistical analyses were carried out in R (Team 2014). To  
183 adjust the *P* values for multiple testing, the R package multcomp was used with the test  
184 specification ‘single-step’(Bretz *et al.* 2016). Graphs were produced using GraphPad Prism 8.

185

186 **Results**

187

188 ***Heterochiasmy in eight intervals of Arabidopsis was unaffected by parental age***

189 Using a set of eight *Arabidopsis* detector lines, we examined the influence of parental age on  
190 male and female CO rates. The eight detector lines heterozygous for both eGFP/dsRed were  
191 reciprocally crossed with Columbia wild type plants, with both parents being one of four ages  
192 (40, 45, 50, and 55 DAS) and MR rates were examined in the collected seeds (Figure 1). The  
193 eight intervals were distributed across all five chromosomes, and varied in length and the degree  
194 of overlap with sub-telomeric or pericentomeric regions (Figure 2; Table 1). One interval (in line  
195 CTL1.2) spanned the centromere.

196

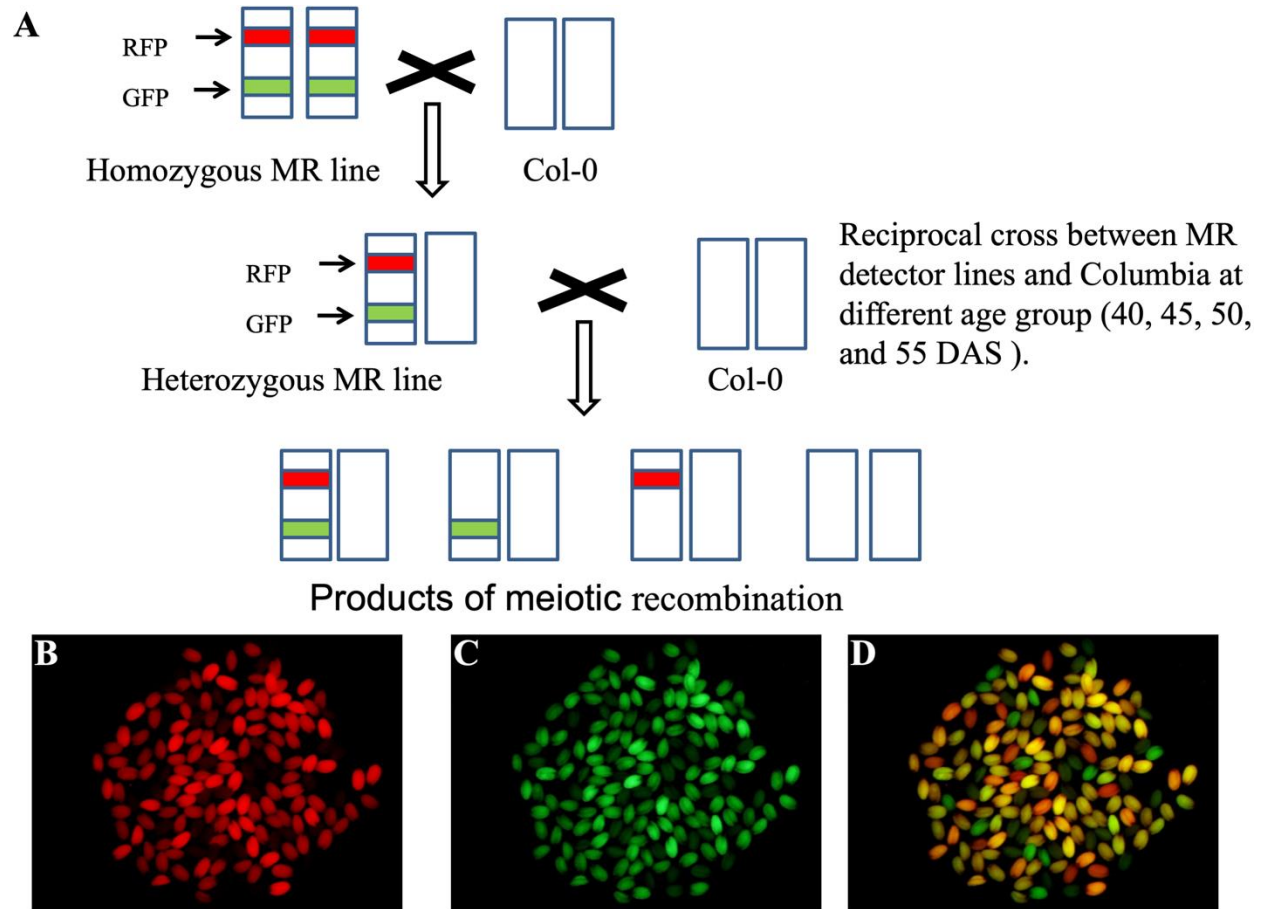

197

198 **Figure 1 (A)** A reciprocal cross between a heterozygous detector line and a Columbia plant  
199 results in seeds with one of four fluorescence patterns: a blend of red and green; only green; only  
200 red; no fluorescence. **(B)** A sample of seeds observed using a dsRed filter; **(C)** The same sample  
201 of seeds observed using an eGFP filter. **(D)** Merged image of B and C showing the four different  
202 patterns of fluorescence. Seeds in which a CO has occurred are those that either have only green  
203 or only red fluorescence, as determined by manual assessment of one image type or (if  
204 necessary) all three image types.

205

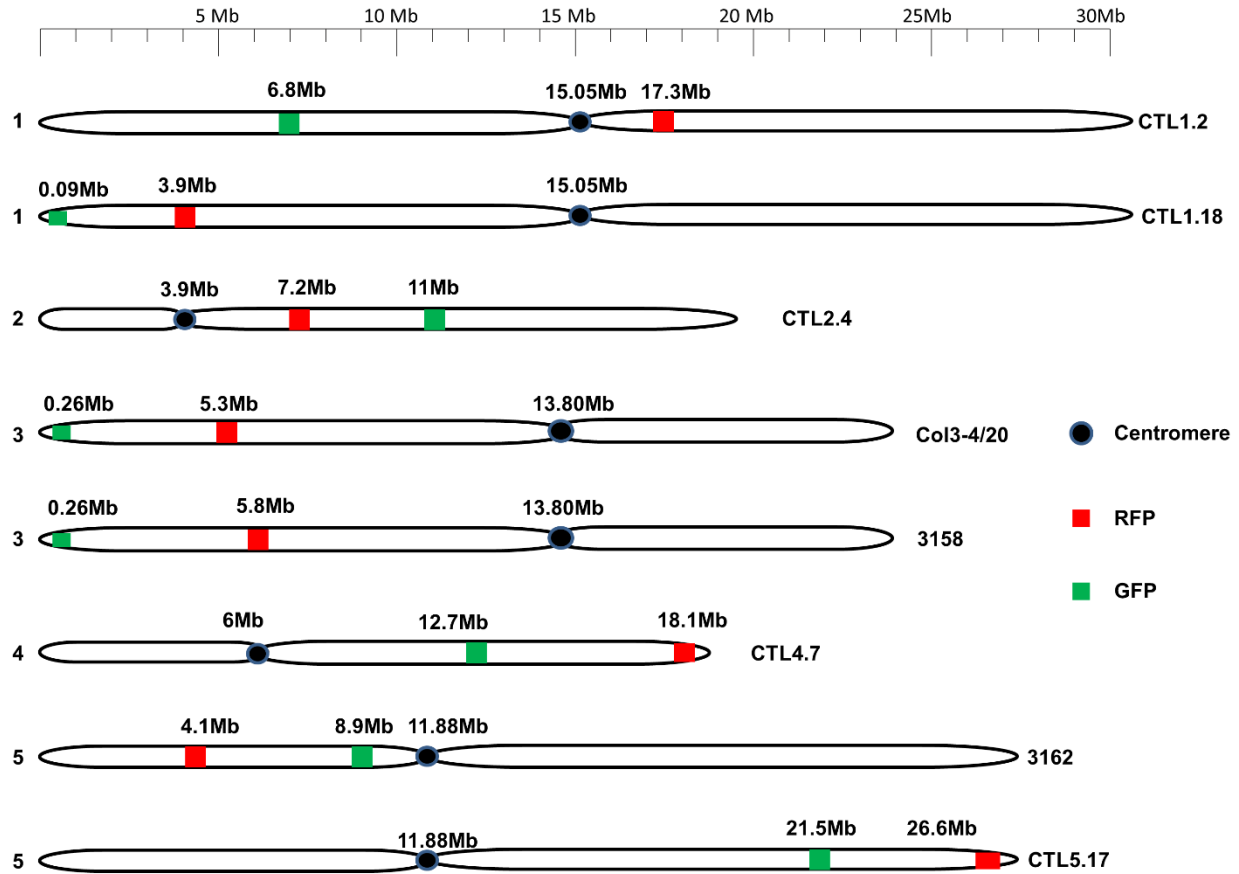

206

207 **Figure 1. Physical maps of the chromosomes showing the location of the inter-marker**

208 **intervals in the detector lines tested.** Positions of eGFP and dsRed were drawn on the physical

209 map using the chromosome map tool of The Arabidopsis Information Resource (TAIR).

210

211

212

213

214 **Table 1 Structural features of the eight intervals used in this study**

215

| Line Name                                 | Chr. No | Centromere position (Mb) | Percentage of interval that is close to a telomere* | Percentage of interval that is close to a centromere** | Length of interval (distance between markers , Mb) |
|-------------------------------------------|---------|--------------------------|-----------------------------------------------------|--------------------------------------------------------|----------------------------------------------------|
| CTL1.2<br>(Centromere is between markers) | 1       | 15.05                    | 0                                                   | 65                                                     | 10.50                                              |
| CTL1.18                                   | 1       | 15.05                    | 100                                                 | 0                                                      | 3.81                                               |
| CTL2.4                                    | 2       | 3.9                      | 0                                                   | 0                                                      | 3.3                                                |
| Col3-4/20                                 | 3       | 13.8                     | 65                                                  | 0                                                      | 5.04                                               |
| 3158                                      | 3       | 13.8                     | 65                                                  | 0                                                      | 5.54                                               |
| CTL4.7                                    | 4       | 6                        | 43                                                  | 0                                                      | 5.4                                                |
| 3162                                      | 5       | 11.88                    | 0                                                   | 22                                                     | 4.8                                                |
| CTL5.17                                   | 5       | 11.88                    | 72                                                  | 0                                                      | 5.1                                                |

216 The table summarises some key features of the intervals bounded by each pair of markers. \*This percentage  
 217 was calculated by determining how much of the interval's length occurs within the first 15% or last 15% of the  
 218 chromosome's length. \*\*This percentage was calculated by determining how much of the interval's length  
 219 occurred in the two regions that are on either side of the centromere (each region being 15% of the  
 220 chromosome's length). For both cases, the choice of 15% was based on the authors' visual analysis of the  
 221 distribution of male and female CO hotspots in each of the five chromosomes, as depicted in Figure 4, Giraut  
 222 *et al.* (2011).

223

224 For each of the eight intervals, there was no significant change in the ratio, mCO : fCO, as the  
 225 age of the male and female parents was increased (Figure 3). Neither did the two individual rates  
 226 that are used to calculate the ratio (i.e. mCO; and fCO) vary with age (Figure 3; Tables S1-8).

227

228

229

230

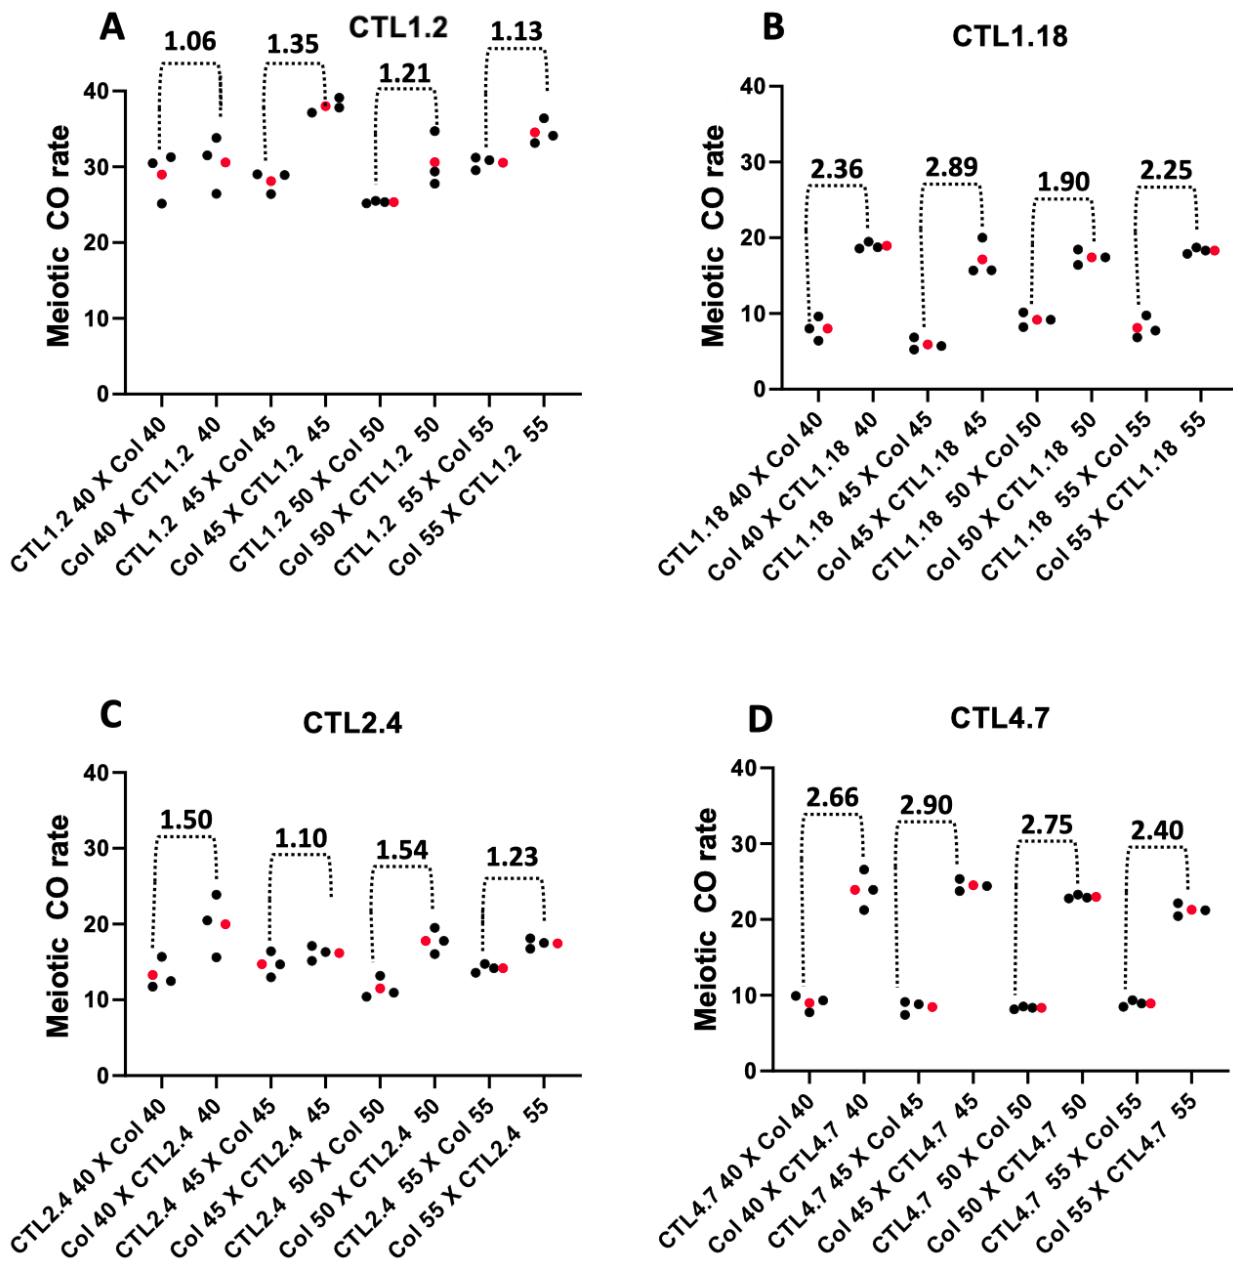

231

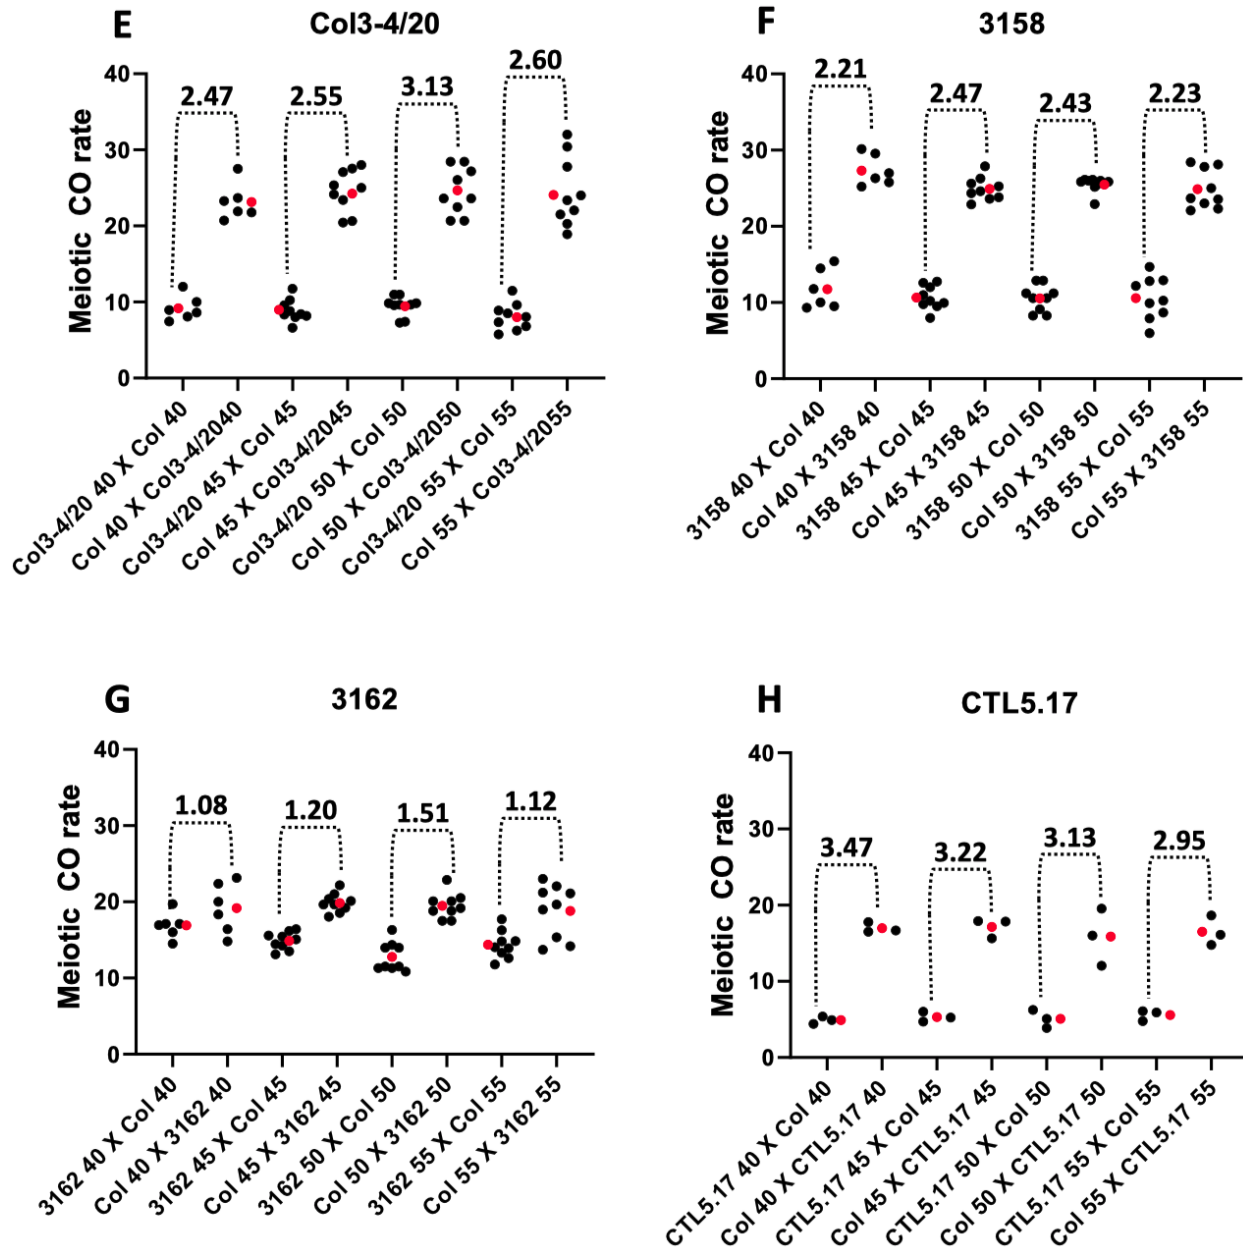

232

233

234 **Figure 3 (A-H) Parental age did not affect CO rates or sex ratios:** Reciprocal crosses

235 between detector lines CTL1.2, CTL1.18, CTL2.4, CTL4.7, Col3-4/20, 3158, 3162, CTL5.17

236 and Columbia plants (of 40, 45, 50 and 55 DAS). Each dotted bracket spans two clusters of

237 datapoints (comprising the full set of datapoints for one age category); the first cluster is of male

238 CO rates, the second of female CO rates. The number above each bracket shows the average

239 ratio of the male and female rates (i.e. mCO:fCO) for each age category. The graph represents  
 240 individual replicated (black dots) and mean value (red dots) of the CO rates. GLM was used for  
 241 detecting significant difference and *P* values were corrected for multiple testing (Supplementary  
 242 Tables S1-8).

243

244

245 The average rates and thus the average heterochiasmic ratios, mCO:fCO, that we have measured  
 246 can also be compared with those predicted by analysis of data published previously (Table S2 in  
 247 Giraut *et al.* (2011)). Their genome-wide study reported the rates of mCO and fCO at 380 shared  
 248 locations across all five *Arabidopsis* chromosomes, demonstrating remarkable variation in both  
 249 rates from location to location. In Table 2 we present the measured and predicted rates and ratios  
 250 (all ages combined), the predicted values being based on our interval-based analysis (Table S12)  
 251 of the location-based data presented in their Table S2 (Giraut *et al.* 2011). The predicted values  
 252 show a good congruence, in terms of their magnitudes relative to each other, with those that we  
 253 measured. This point is evident when the measured and predicted ratios are ranked from high or  
 254 low, according to their magnitude (Table 2).

255 **Table 2 Measured and predicted male and female CO rates and their ratios**

256

| Line Name | Chr.<br>No. | Measured                                     |                                              | Predicted                                      |                                                | Measured                                       |                                                | Predicted |  | Measured<br>mCO:fCO<br><br>(All ages | Predicted<br>mCO:fCO |
|-----------|-------------|----------------------------------------------|----------------------------------------------|------------------------------------------------|------------------------------------------------|------------------------------------------------|------------------------------------------------|-----------|--|--------------------------------------|----------------------|
|           |             | average CO<br>rates in<br>males<br><br>(mCO) | average CO<br>rates in<br>males<br><br>(mCO) | average CO<br>rates in<br>females<br><br>(fCO) | average CO<br>rates in<br>females<br><br>(fCO) | average MR<br>rates in<br>females<br><br>(fCO) | average MR<br>rates in<br>females<br><br>(fCO) |           |  |                                      |                      |

|           |   |       |       |       |       | <b>combined</b> |             |              |             |
|-----------|---|-------|-------|-------|-------|-----------------|-------------|--------------|-------------|
|           |   |       |       |       |       | <b>Ratio</b>    | <b>Rank</b> | <b>Ratio</b> | <b>Rank</b> |
| CTL1.2    | 1 | 33.44 | 45.26 | 28.24 | 37.59 | 1.184           | 7           | 1.20         | 8           |
| CTL1.18   | 1 | 17.95 | 19.43 | 7.81  | 5.98  | 2.30            | 4           | 3.25         | 2           |
| CTL2.4    | 2 | 17.84 | 17.84 | 13.41 | 13.41 | 1.33            | 5           | 2.31         | 6           |
| Col3-4/20 | 3 | 24.04 | 24.04 | 8.90  | 8.90  | 2.67            | 2           | 3.49         | 1           |
| 3158      | 3 | 25.66 | 25.66 | 10.88 | 10.88 | 2.33            | 3           | 3.06         | 4           |
| CTL4.7    | 4 | 23.17 | 23.17 | 8.67  | 8.67  | 2.67            | 2           | 3.21         | 3           |
| 3162      | 5 | 19.33 | 19.33 | 14.73 | 14.73 | 1.22            | 6           | 1.28         | 7           |
| CTL5.17   | 5 | 16.62 | 15.48 | 5.21  | 5.98  | 3.20            | 1           | 2.45         | 5           |

257 The table shows the measured and predicted sex-specific CO rates and their ratios for each of the eight  
258 intervals studied here. The data for all age categories were combined because there was no significance  
259 difference across the four ages. All the rate values are dimension-less and thus relative only to other values in  
260 the same column, and to values in the corresponding *measured* or *predicted* column (i.e. column 3 values can  
261 be compared to those in column 5; likewise for columns 4 and 6). The predicted rate values were based on our  
262 analysis of the data provided in Giraut *et al.* (2011), Table S2. That data provides location-based male and  
263 female CO rates for 11 to 33 points per interval. Here, for each interval, the predicted rate was calculated as the  
264 average male or female CO rate across the interval, multiplied by the length of the interval (as per the values  
265 shown in our Table 1). Comparison of the values in the columns labelled ‘Rank’ in our Table 2 show that  
266 when the measured ratios are ordered by numerical magnitude, their high-low sequence is similar to that of the  
267 predicted ratios.

268



269 ***Levels of heterochiasmy in eight intervals of Arabidopsis varied with the interval studied***

270

271 The ratio mCO:fCO did, however, vary significantly on an interval by interval basis (Figure 3;  
272 Table 2). For example, the ratio of the average mCO:average fCO (across all four ages for any  
273 one interval) varied between 1.18 (CTL1.2) and 3.20 (CTL5.17; Table 2). These two lines also  
274 exhibited the most extreme values for both of the individual rates, mCO and fCO. CTL1.2,  
275 which had the lowest ratio, had the highest individual rates (mCO: 33.44; fCO: 28.24); while  
276 CTL5.17, which had the highest ratio, had the lowest rates (mCO: 16.62; fCO: 5.21) (Table 2).

277

278 The relatively higher values of the measured male and female CO rates of detector line CTL1.2  
279 were also predicted by our analysis of the data from Table S2 of Giraut *et al.* (2011). A high CO  
280 rate in an interval can be the consequence of the number and strength of its CO hotspots and/or  
281 the length of the interval. In the case of CTL1.2, the high male rate was solely due to the interval  
282 being two to three times longer than any of the others. According to our analysis of Table S2,  
283 Giraut *et al.* (2011), the average male rate along this interval (as measured in the earlier study) is  
284 in fact the second lowest of the eight intervals. For the relatively higher female rate of CTL1.12,  
285 the interval's female hotspots also contributed: it has the highest average rate of recombination  
286 of any of the intervals (calculated from Table S2, Giraut *et al.* (2011)).

287

288 The pattern of high or low sex ratios can also be predicted from our calculations of the  
289 percentage overlap that intervals have with the subtelomeric and pericentromeric regions. For  
290 example, the only intervals with an mCO:fCO of less than 2.0 (i.e. CTL1.2; CTL2.4; 3162; Table

291 2), are those that have no overlap with a subtelomeric region (Table 1), which are known for  
292 their concentration of male CO hotspots (Giraut *et al.* 2011).

293

294

## 295 **Discussion**

296

297 *Levels of heterochiasmy in Arabidopsis likely show a wide range of intrachromosomal*  
298 *responses to parental age*

299 Our results provide new insights into a previous finding that heterochiasmy in *Arabidopsis*  
300 decreases with age (Toyota *et al.* 2011). The current study, only the second to address the topic,  
301 showed that in eight out of eight intervals, heterochiasmy did not change with age. However, we  
302 do not believe that our results challenge the previous finding. As we will discuss below, we  
303 would accept that on a genomic or chromosomal basis, the ratio mCO:fCO is likely to decrease  
304 with age; but, our results, when considered together with previous work, suggest that, within any  
305 given chromosome, the ratio is unlikely to decrease at many locations. That is, we propose that  
306 heterochiasmy in *Arabidopsis* shows a wide spectrum of intrachromosomal responses to age,  
307 including, at some locations, no response at all.

308

309 For all eight intervals studied here, distributed across all five each chromosomes, neither did  
310 mCO:fCO, nor its component rates, change with age. The reliability of our ratio estimations is  
311 supported by the good agreement of our results with the rates and ratios that can be calculated  
312 using the values of mCO and fCO that Giraut *et al.* (2011) provide for multiple locations within  
313 each interval. Some discrepancies might be expected given the different genetic background of

314 the accessions used in the two studies. The relative values of the measured rates and ratios are  
315 also as predicted, as accurately as can be expected, by the extent of overlap between an interval  
316 and the subtelomeric and pericentromeric regions of the chromosome.

317

318 The likelihood that heterochiasmy shows intrachromosomal variation in its response to age is  
319 supported by considering our results together with those of Li *et al.* (2017) and Toyota *et al.*  
320 (2011). Li *et al.* (2017) studied nine intervals (none of which corresponded to any of our eight)  
321 and found that mCO did not change with age in five of nine intervals studied, and increased in  
322 two; significantly, there were two cases where, in a single chromosome, mCO changed  
323 significantly with age for one interval but not another (Figure 3, Li *et al.* 2017). Although they  
324 did not study the response of fCO, the intrachromosomal variation in the response of mCO  
325 would also likely lead to variation in the response of mCO:fCO for the intervals studied. Further,  
326 in the study of Toyota *et al.* (2011), there was considerable variation, across the chromosomes, in  
327 the response of mCO:fCO to age. This was primarily driven by variation in the degree to which  
328 fCO increased with age; this increase varied from 1% in chromosome 4 to 14% in chromosome 3  
329 (analysis of Table 5; Toyota *et al.* 2011). Likewise, in the same study, while the response of  
330 mCO to age did not change significantly when all five chromosomes were considered together, it  
331 did increase by 7% in both chromosomes 1 and 5 (analysis of Table 5; Toyota *et al.* 2011). It is  
332 likely that these interchromosomal variations are accompanied by variation at the  
333 intrachromosomal level. For example, in chromosome 1, where Toyota *et al.* (2011) found no  
334 change in the response of mCO, and only a 1% average change for fCO, there must be many  
335 locations where the ratio mCO : fCO did not change with age at all - as we found for all intervals

336 in our study. Also of note here is the study of Francis *et al.* (2007), which found that mCO did  
337 not change in response to age.

338

339 From our results, together with those of the two previous studies mentioned above (Toyota *et al.*  
340 2011; Li *et al.* 2017), one can propose the following: that as we consider each location along a  
341 chromosome of *Arabidopsis* in turn, we will find that: (1) the rates of male and female meiosis  
342 will change (as shown by Giraut *et al.* 2011), as will, for many cases, the degree of  
343 heterochiasmy; and (2) the sensitivity of rates/ratio to age will change, such that the percentage  
344 response to age at any one location will sit somewhere along a broad continuum of values, the  
345 starting point of which is zero.

346

347 ***Which meiotic processes could be responsible for intrachromosomal variability in the response***  
348 ***of heterochiasmy to age?***

349

350 That such a spectrum of age x gender responsiveness exists within a chromosome is not  
351 unexpected. A chromosome is highly heterogeneous entity in many respects, and this  
352 heterogeneity takes differing forms in male and female meiosis. For example, in humans,  
353 synapsis initiation sites are found near the telomeres in male meiosis (Brown *et al.* 2005), but  
354 interstitially in females (Lynn *et al.* 2004). Since synapsis initiation sites are also sites for CO  
355 (Choi and Henderson 2015), this means that: (a) we can expect different rates of male and female  
356 CO at two more or less defined locations within the chromosome; and (b) since each of those  
357 locations will vary epigenetically in male and female meiosis (i.e. supporting or not supporting

358 synapsis initiation), this opens up the possibility that each will also respond differently to the  
359 many cellular changes that accompany ageing.

360 In *Arabidopsis*, there is not the same tight coupling between synapsis initiation and CO  
361 (Chelysheva *et al.* 2007). However, we can be certain that, if we compare any pair of  
362 corresponding locations in a chromosome undergoing male or female meiosis, there is a high  
363 probability that their epigenetic environments will differ. A visual scan of the male and female  
364 recombination landscapes of any of the five chromosomes (Figure 4, Giraut *et al.* 2011) shows  
365 that the rates, and the ratio, mCO: CO, vary frequently and dramatically from location to  
366 location. Their analysis found that amongst 380 locations in the genome, more than half were  
367 significantly hot or cold, in terms of male or female CO rates. The hotspots are thus necessarily  
368 not just concentrated in one area of the chromosome: e.g. 27/40 of the male hotspots occur away  
369 from the telomeres (Figure 4, Giraut *et al.* 2011). Given that the chromosomes involved in male  
370 and female meiosis have the same sequence, a mechanistic explanation for the difference  
371 between the CO rates at the same location must lie in their exposure to different epigenetic  
372 conditions. As with the human example described in the previous paragraph, this will create the  
373 potential for intrachromosomal and sex-based variation in the responses to age.

374 The mechanisms that might lead to these local chromosomal differences in mCO and fCO, or the  
375 cumulative differences they bring about at the genome level, have been the focus of many studies  
376 in *Arabidopsis*, and these have indicated a range of epigenetic mechanisms that could provide a  
377 ‘substrate’ for some or all of the intrachromosomal variation in age x gender responses. What is  
378 interesting to consider, for our purposes, is which of the mechanisms might be both: (1)

379 significantly important for the differences in male and female CO rates; and (2) highly  
380 responsive to age.

381  
382 Perhaps the strongest candidate is the degree of chromatin compaction, including -for each  
383 ‘level’ of compaction- the associated molecular players that maintain that level. In *Arabidopsis*,  
384 female chromosomes are markedly more compact, as indexed by their much shorter  
385 synaptonemal complexes (Drouaud *et al.* 2007); synaptonemal complex length is a known  
386 indicator of chromatin compaction and a predictor of meiotic combination rate in *Arabidopsis*,  
387 and other species (Kleckner 2006; Drouaud *et al.* 2007; Brachet *et al.* 2012; Zickler and  
388 Kleckner 2015; Wang *et al.* 2016; Modliszewski and Copenhaver 2017). Modelling studies have  
389 also indicated that sex variations in chromosomal structural axis length (which is related to  
390 synaptonemal complex length) are sufficient to explain the sex variation in CO rates in  
391 *Arabidopsis* (Zickler and Kleckner 2015). Control of chromatin organisation ensures that  
392 chromosomes have the right length, and other structural features, that are critical to the proper  
393 alignment of daughter chromatids, and thus crossing over itself (Brachet *et al.* 2012; Stapley *et*  
394 *al.* 2017).

395  
396 Chromatin restructuring, particularly of heterochromatin, is also well established as one of the  
397 common features of cellular ageing and senescence in animals; chromatin becomes locally more  
398 or less compact with age (Vaquero *et al.* 2003; Swanson *et al.* 2015). In plants, less is known,  
399 but methylation patterns, which are associated with both chromatin compaction and CO rates, do  
400 change with age: in *Arabidopsis*, for example, ageing is accompanied by DNA demethylation  
401 (Ogneva *et al.* 2016); also, in *Arabidopsis* leaf senescence, heterochromatin disintegrates (Ay *et*

402 *al.* 2009). Another feature of chromatin compaction that makes it an attractive candidate is that  
403 the level of compaction naturally varies along the length of the chromosome, being negatively  
404 correlated with gene density (Brachet *et al.* 2012). This, together, with the known global  
405 differences between compaction levels in male and female meiotic cells, suggests that local  
406 variations in compaction level could provide the rich epigenetic substrate needed for the  
407 extensive age x gender intrachromosomal variation indicated by the current and previous  
408 findings.

409

#### 410 ***Conclusions***

411

412 Our results help, we believe, to clarify how the levels of heterochiasmy in *Arabidopsis* respond  
413 to age. From previous work, it might be concluded that the level of disparity between rates will  
414 drop universally across the genome, but we suggest that the magnitude, perhaps even the  
415 direction, of the response depends on which part of the genome is sampled. This has implications  
416 for other studies that look at the interactive effects of multiple factors on any given meiotic  
417 response, indicating the possibility of different findings if global or local sampling approaches  
418 are adopted. Our results will also be of interest to researchers who are looking for ways to bring  
419 about increased CO rates in specific regions of the genome (Fernandes *et al.* 2018). If any given  
420 approach to inducing a rate increase has been rejected in the past because it did not lead to a  
421 global rate increase, the possibility nevertheless remains that the approach might induce  
422 increased CO rates in a local genomic region of interest.

423

424

425

## 426 **Author Contributions**

427 Conceived and designed the experiments: RS, AKS and RB. Performed the experiments and  
428 compiled the data: RS. Analysed the data: RS, AKS, GJH, and RB. Wrote the paper: RS, AKS,  
429 GJH and RB.

430

## 431 **Acknowledgements**

432 We would like to thank Avraham A. Levy (Weizmann Institute of Science, Israel) for providing  
433 seeds of MR detector lines. We would like to thank the Arabidopsis Biological Resource Center  
434 (The Ohio State University, USA) for providing traffic line seeds.

435

## 436 **Literature Cited**

437 Alves I., A. A. Houle, J. G. Hussin, and P. Awadalla, 2017 The impact of recombination on  
438 human mutation load and disease. *Philos. Trans. R. Soc. B Biol. Sci.* 372: 20160465.  
439 <https://doi.org/10.1098/rstb.2016.0465>

440 Ay N., K. Irmeler, A. Fischer, R. Uhlemann, G. Reuter, *et al.*, 2009 Epigenetic programming via  
441 histone methylation at WRKY53 controls leaf senescence in *Arabidopsis thaliana*. *Plant J.* 58:  
442 333–346. <https://doi.org/10.1111/j.0960-7412.2009.03782.x>

443 Brachet E., V. Sommermeyer, and V. Borde, 2012 Interplay between modifications of chromatin  
444 and meiotic recombination hotspots. *Biol. Cell* 104: 51–69.  
445 <https://doi.org/10.1111/boc.201100113>



- 446 Bretz F., T. Hothorn, and P. Westfall, 2016 *Multiple comparisons using R*. Chapman and  
447 Hall/CRC.
- 448 Brown P. W., L. Judis, E. R. Chan, S. Schwartz, A. Seftel, *et al.*, 2005 Meiotic synapsis proceeds  
449 from a limited number of subtelomeric sites in the human male. *Am. J. Hum. Genet.* 77: 556–  
450 566.
- 451 Charlesworth D., and X. Vekemans, 2005 How and when did *Arabidopsis thaliana* become  
452 highly self-fertilising. *BioEssays* 27: 472–476. <https://doi.org/10.1002/bies.20231>
- 453 Chelysheva L., G. Gendrot, D. Vezon, M.-P. Doutriaux, R. Mercier, *et al.*, 2007 Zip4/Spo22 is  
454 required for Class I CO formation but not for synapsis completion in *Arabidopsis thaliana*. *PLOS*  
455 *Genet.* 3: e83. <https://doi.org/10.1371/journal.pgen.0030083>
- 456 Chiang T., R. M. Schultz, and M. A. Lampson, 2012 Meiotic origins of maternal age-related  
457 aneuploidy1. *Biol. Reprod.* 86. <https://doi.org/10.1095/biolreprod.111.094367>
- 458 Choi K., and I. R. Henderson, 2015 Meiotic recombination hotspots – a comparative view. *Plant*  
459 *J.* 83: 52–61. <https://doi.org/10.1111/tpj.12870>
- 460 Drouaud J., V. Zanni, and D. Brunel, 2007 Sex-specific crossover distributions and variations in  
461 interference level along *Arabidopsis thaliana* chromosome 4. *PLoS Genet.* 3: 12.
- 462 Fernandes J. B., M. Séguéla-Arnaud, C. Larchevêque, A. H. Lloyd, and R. Mercier, 2018  
463 Unleashing meiotic crossovers in hybrid plants. *Proc. Natl. Acad. Sci.* 115: 2431.  
464 <https://doi.org/10.1073/pnas.1713078114>

- 465 Francis K. E., S. Y. Lam, B. D. Harrison, A. L. Bey, L. E. Berchowitz, *et al.*, 2007 Pollen tetrad-  
466 based visual assay for meiotic recombination in Arabidopsis. Proc. Natl. Acad. Sci. 104: 3913–  
467 3918. <https://doi.org/10.1073/pnas.0608936104>
- 468 Gabriel K. R., 1969 Simultaneous test procedures--some theory of multiple comparisons. Ann.  
469 Math. Stat. 224–250.
- 470 Giraut L., M. Falque, J. Drouaud, L. Pereira, O. C. Martin, *et al.*, 2011 Genome-wide crossover  
471 distribution in Arabidopsis thaliana meiosis reveals sex-specific patterns along chromosomes,  
472 (M. Lichten, Ed.). PLoS Genet. 7: e1002354. <https://doi.org/10.1371/journal.pgen.1002354>
- 473 Halldorsson B. V., M. T. Hardarson, B. Kehr, U. Styrkarsdottir, A. Gylfason, *et al.*, 2016 The  
474 rate of meiotic gene conversion varies by sex and age. Nat. Genet. 48: 1377–1384.  
475 <https://doi.org/10.1038/ng.3669>
- 476 Hayman D. L., and P. A. Parsons, 1962 The effect of temperature, age and an inversion on  
477 recombination values and interference in the X-chromosome of Drosophila melanogaster.  
478 Genetica 32: 74–88. <https://doi.org/10.1007/BF01816087>
- 479 Hussin J., M.-H. Roy-Gagnon, R. Gendron, G. Andelfinger, and P. Awadalla, 2011 Age-  
480 dependent recombination rates in human pedigrees, (G. McVean, Ed.). PLoS Genet. 7:  
481 e1002251. <https://doi.org/10.1371/journal.pgen.1002251>
- 482 John A., K. Vinayan, and J. Varghese, 2016 Achiasmy: Male fruit flies are not ready to mix.  
483 Front. Cell Dev. Biol. 4. <https://doi.org/10.3389/fcell.2016.00075>

- 484 Kleckner N., 2006 Chiasma formation: chromatin/axis interplay and the role(s) of the  
485 synaptonemal complex. *Chromosoma* 115: 175.
- 486 Lenormand T., 2003 The evolution of sex dimorphism in recombination. *Genetics* 163: 811–822.
- 487 Lenormand T., and J. Dutheil, 2005 Recombination Difference between sexes: A role for haploid  
488 selection. *PLoS Biol.* 3: e63. <https://doi.org/10.1371/journal.pbio.0030063>
- 489 Li F., N. De Storme, and D. Geelen, 2017 Dynamics of male meiotic recombination frequency  
490 during plant development using Fluorescent Tagged Lines in *Arabidopsis thaliana*. *Sci. Rep.* 7:  
491 42535. <https://doi.org/10.1038/srep42535>
- 492 López E., M. Pradillo, C. Oliver, C. Romero, N. Cuñado, *et al.*, 2012 Looking for natural  
493 variation in chiasma frequency in *Arabidopsis thaliana*. *J. Exp. Bot.* 63: 887–894.  
494 <https://doi.org/10.1093/jxb/err319>
- 495 Lynn A., T. Ashley, and T. Hassold, 2004 Variation in human meiotic recombination. *Annu Rev*  
496 *Genomics Hum Genet* 5: 317–349.
- 497 Martin H. C., R. Christ, J. G. Hussin, J. O’Connell, S. Gordon, *et al.*, 2015 Multicohort analysis  
498 of the maternal age effect on recombination. *Nat. Commun.* 6: 7846.  
499 <https://doi.org/10.1038/ncomms8846>
- 500 McKee B. D., R. Yan, and J.-H. Tsai, 2012 Meiosis in male *Drosophila*. *Spermatogenesis* 2:  
501 167–184. <https://doi.org/10.4161/spmg.21800>

502 Melamed-Bessudo C., E. Yehuda, A. R. Stuitje, and A. A. Levy, 2005 A new seed-based assay  
503 for meiotic recombination in *Arabidopsis thaliana*: Meiotic recombination in *Arabidopsis*  
504 *thaliana*. *Plant J.* 43: 458–466. <https://doi.org/10.1111/j.1365-313X.2005.02466.x>

505 Modliszewski J. L., and G. P. Copenhaver, 2017 Meiotic recombination gets stressed out: CO  
506 frequency is plastic under pressure. *Curr. Opin. Plant Biol.* 36: 95–102.  
507 <https://doi.org/10.1016/j.pbi.2016.11.019>

508 Nagaoka S. I., T. J. Hassold, and P. A. Hunt, 2012 Human aneuploidy: mechanisms and new  
509 insights into an age-old problem. *Nat. Rev. Genet. Lond.* 13: 493–504.  
510 <http://dx.doi.org.ezproxy.uws.edu.au/10.1038/nrg3245>

511 Nelder J. A., and R. W. Wedderburn, 1972 Generalized linear models. *J. R. Stat. Soc. Ser. Gen.*  
512 135: 370–384.

513 Ogneva Z. V., A. S. Dubrovina, and K. V. Kiselev, 2016 Age-associated alterations in DNA  
514 methylation and expression of methyltransferase and demethylase genes in *Arabidopsis thaliana*.  
515 *Biol. Plant.* 60: 628–634. <https://doi.org/10.1007/s10535-016-0638-y>

516 Ritz K. R., M. A. F. Noor, and N. D. Singh, 2017 Variation in recombination rate: Adaptive or  
517 not? *Trends Genet.* 33: 364–374. <https://doi.org/10.1016/j.tig.2017.03.003>

518 Saini R., A. K. Singh, S. Dhanapal, T. H. Saeed, G. J. Hyde, *et al.*, 2017 Brief temperature stress  
519 during reproductive stages alters meiotic recombination and somatic mutation rates in the  
520 progeny of *Arabidopsis*. *BMC Plant Biol.* 17: 103. <https://doi.org/10.1186/s12870-017-1051-1>  
521

- 522 Satomura K., N. Osada, and T. Endo, 2019 Achiasmy and sex chromosome evolution. *Ecol.*  
523 *Genet. Genomics* 13: 100046. <https://doi.org/10.1016/j.egg.2019.100046>
- 524 Singh A. K., T. Bashir, C. Sailer, V. Gurumoorthy, A. M. Ramakrishnan, *et al.*, 2015 Parental  
525 age affects somatic mutation rates in the progeny of flowering plants. *Plant Physiol.* 168: 247–  
526 257. <https://doi.org/10.1104/pp.15.00291>
- 527 Stapley J., P. G. D. Feulner, S. E. Johnston, A. W. Santure, and C. M. Smadja, 2017 Variation in  
528 recombination frequency and distribution across eukaryotes: patterns and processes. *Philos.*  
529 *Trans. R. Soc. B Biol. Sci.* 372: 20160455. <https://doi.org/10.1098/rstb.2016.0455>
- 530 Swanson E. C., L. M. Rapkin, D. P. Bazett-Jones, and J. B. Lawrence, 2015 Unfolding the story  
531 of chromatin organization in senescent cells. *Nucleus* 6: 254–260.  
532 <https://doi.org/10.1080/19491034.2015.1057670>
- 533 Toyota M., K. Matsuda, T. Kakutani, M. Terao Morita, and M. Tasaka, 2011 Developmental  
534 changes in crossover frequency in *Arabidopsis*: Sex and age dependence of crossover frequency.  
535 *Plant J.* 65: 589–599. <https://doi.org/10.1111/j.1365-313X.2010.04440.x>
- 536 Vaquero A., A. Loyola, and D. Reinberg, 2003 The constantly changing face of chromatin. *Sci.*  
537 *Aging Knowl. Environ.* 2003: 4.
- 538 Wang Z., B. Shen, J. Jiang, J. Li, and L. Ma, 2016 Effect of sex, age and genetics on crossover  
539 interference in cattle. *Sci. Rep.* 6: 37698. <https://doi.org/10.1038/srep37698>
- 540 Wu G., G. Rossidivito, T. Hu, Y. Berlyand, and R. S. Poethig, 2015 Traffic lines: new tools for  
541 genetic analysis in *Arabidopsis thaliana*. *Genetics* 200: 35–45.

542 Zickler D., and N. Kleckner, 2015 Recombination, pairing, and synapsis of homologs during  
543 meiosis. *Cold Spring Harb. Perspect. Biol.* 7. <https://doi.org/10.1101/cshperspect.a016626>

544

545

546
